# Supplementary material for: Targeting the cross-talk between Urokinase receptor and Formyl peptide receptor type 1 to prevent invasion and trans-endothelial migration of melanoma cells
Source: Springer Nature journal article supplement (doi:10.1186/s13046-017-0650-x), 2017-12-01
Supplement: MOESM4 [file 15290712]

## Supplementary Figure S2: Proliferation rate of melanoma cells

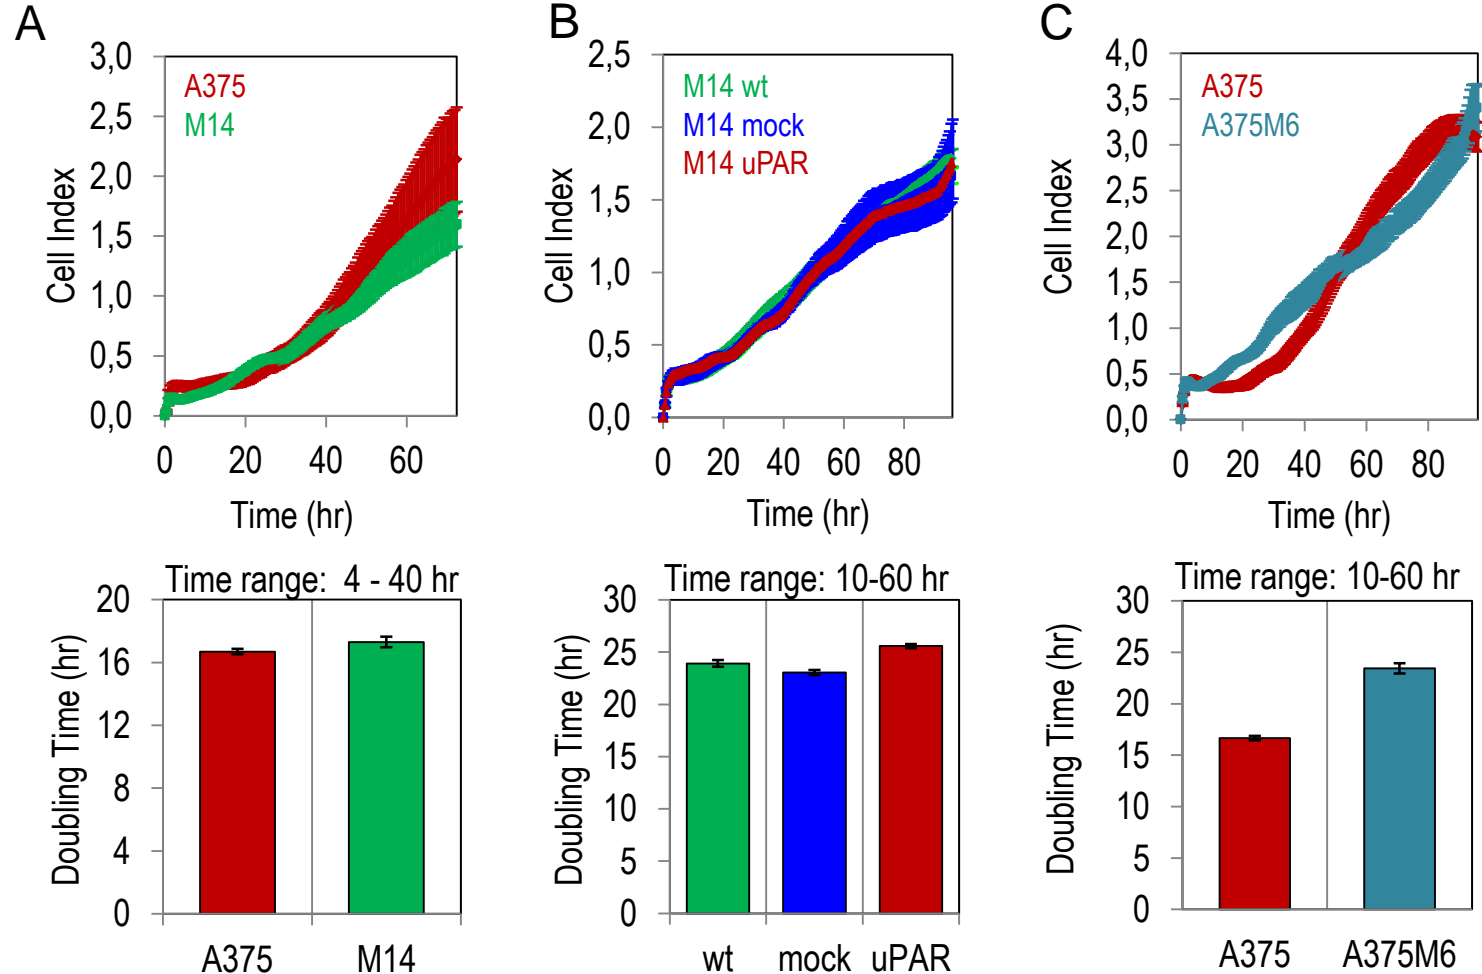

Cell proliferation of the indicated melanoma cell lines assessed by monitoring impedance by RTCA xCELLigence system. The reported doubling times were calculated from the cell growth curves, during exponential growth. Data represent mean  $\pm$  SD from a quadruplicate experiment representative of 3 replicates.
